# Supplementary material
Source: PubMed Central journal article supplement (PMC8459796)
Supplement: NIHMS1541055-supplement-1.pdf [file NIHMS1541055-supplement-1.pdf]

**Supplementary Table 1.** International classification of disease (ICD) codes used to identify indicators outcomes used in analyses

|                         | <b>ICD-9</b>     | <b>ICD-10</b>               |
|-------------------------|------------------|-----------------------------|
| Pneumonia               | 480-486, 770.0   | J06-J189, J20-J22           |
| Other infections        | 001–139          | A00-B99                     |
| Cardiovascular diseases | 390–459          | I00 – I99                   |
| All Neoplasms           | 140–239          | C00-D099                    |
| Malignant neoplasm      | 140-175, 179-199 | C00-C809, C97-C97, D00-D099 |
